# Supplementary material for: Having a pair: the key to immune evasion for the diploid pathogen Schistosoma japonicum
Source: PubMed Central journal article supplement — Sci Rep. 2012 Mar 30;2:346. doi: 10.1038/srep00346 (PMC3315692; doi:10.1038/srep00346), 2012-03-30
Supplement: srep00346-s1.pdf [file srep00346-s1.pdf]

**Having a pair: the key to immune evasion for the diploid pathogen**  
*Schistosoma japonicum*

Xindong Xu<sup>1</sup>, Jun Sun<sup>1</sup>, Jingjing Zhang<sup>1</sup>, Dianne Wellems<sup>1,2</sup>, Xiaoxing Qing<sup>1</sup>, Thomas McCutchan<sup>2</sup> and Weiqing Pan<sup>1,2,\*</sup>

<sup>1</sup>Institute for Infectious Diseases and Vaccine Development, Tongji University School of Medicine, 1239 Siping Road, Shanghai 200092, PR China. <sup>2</sup>Department of Pathogen Biology, Second Military Medical University, 800 Xiang Yin Road, Shanghai 200433, PR China.

\* Correspondence and requests for materials should be addressed to W.P.  
(wqpan0912@yahoo.com.cn)

## **Supplementary Information**

Supplementary Figure 1 to 7

Supplementary Table 1 to 3

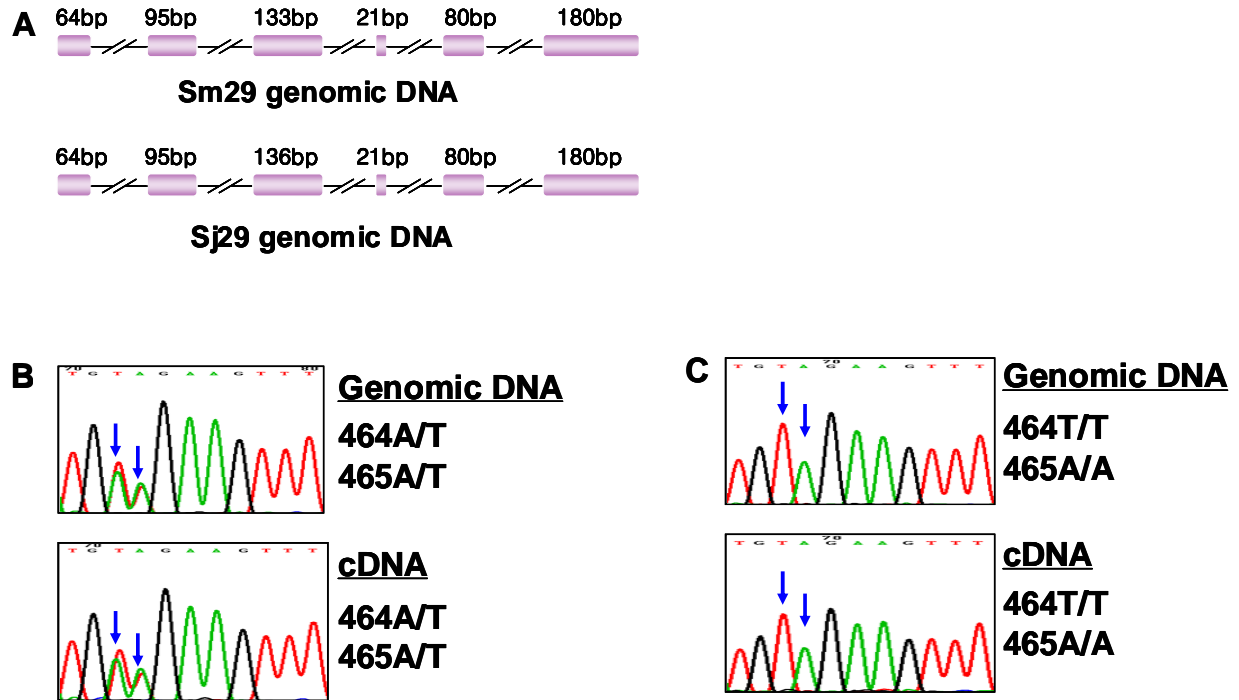

**Supplementary Figure 1.** Genomic structure and allelic expression pattern of Sj29.

(A) Genomic structure of Sj29 and Sm29. The size of exons is indicated.

(B) Chromatograms of exon 6 sequence of heterozygous worm.

(C) Chromatograms of exon 6 sequence of homologous worm.

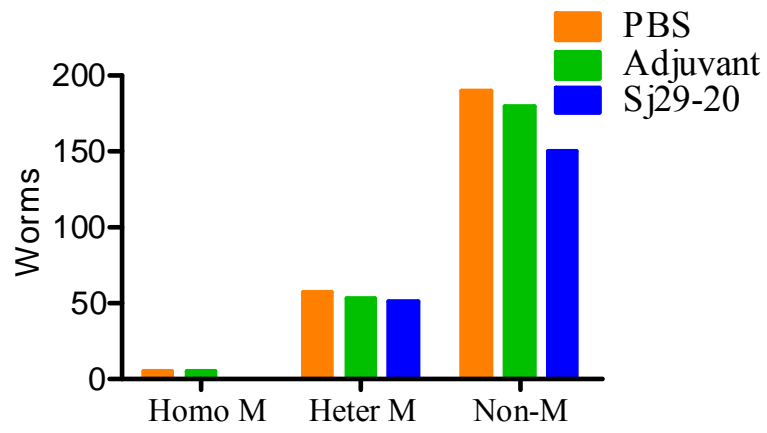

**Supplementary Figure 2.** Comparison of the distribution of homozygotes and heterozygotes in Sj29-20 immunized and control groups.

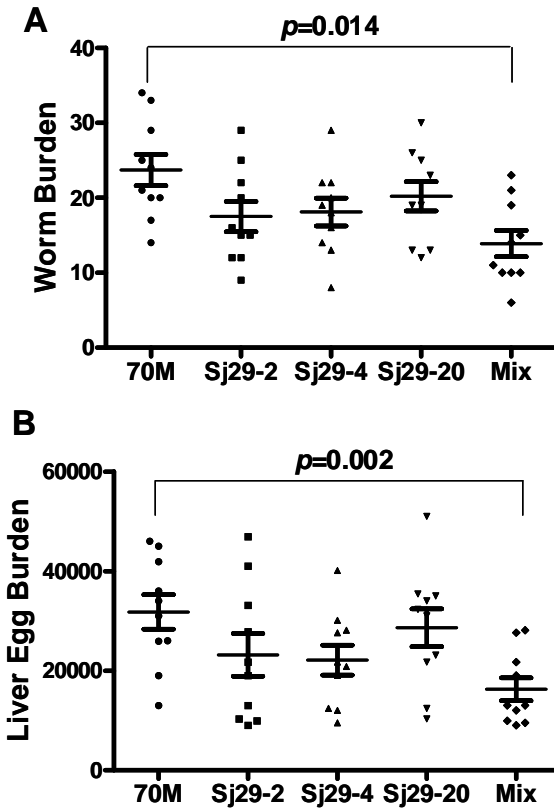

**Supplementary Figure 3.** Comparison of protection efficacy against field isolates in adjuvant, individual alleles (Sj29-2, Sj29-4, and Sj29-20) and an allele mixture (Mix) immunized groups. (A) Worm burdens. (B) Liver egg burdens.

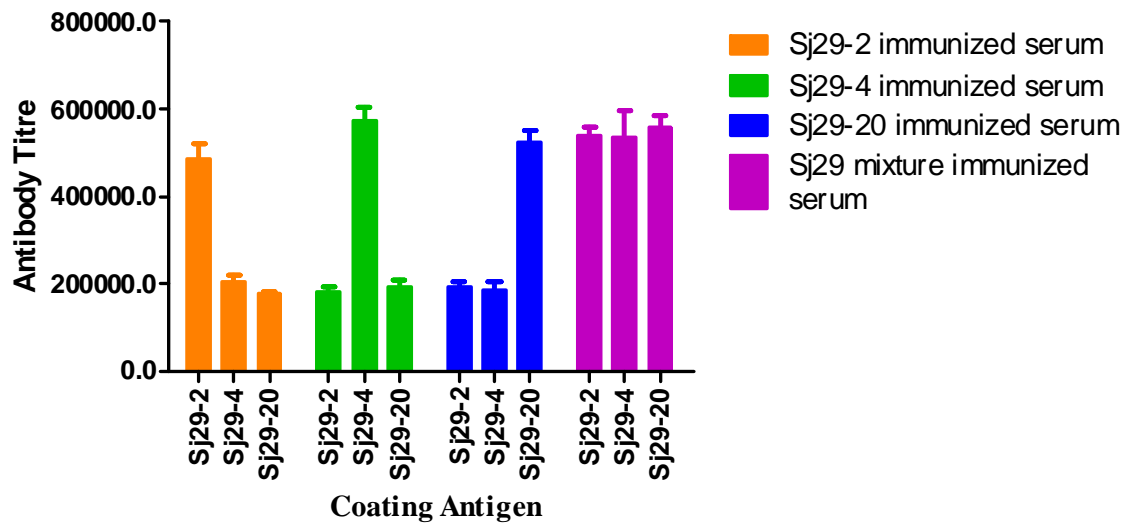

**Supplementary Figure 4.** The antibody titres against different antigens (Sj29-2, Sj29-4 and Sj29-20) in mice immunized with single protein or multiple protein.

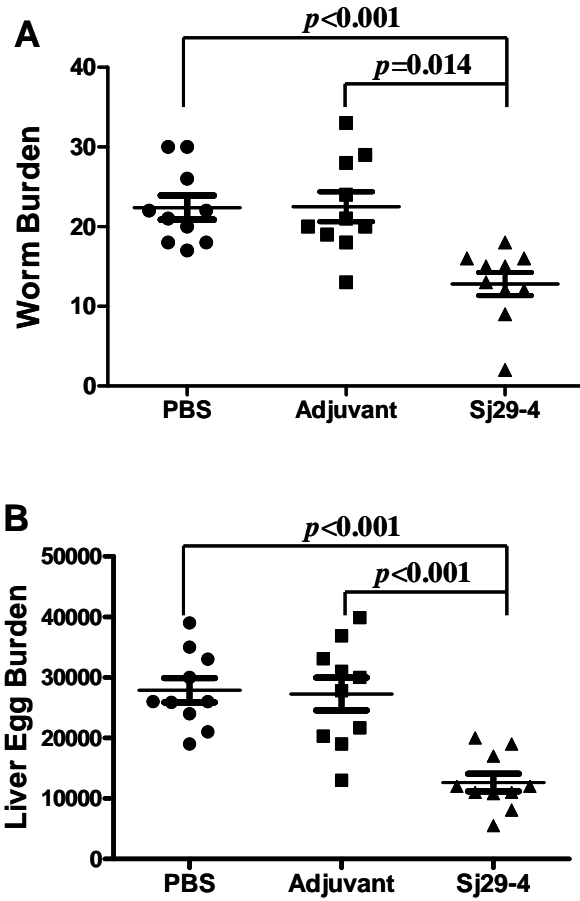

**Supplementary Figure 5.** Comparison of protection efficacy against a clonal isolate Sj6M8 in PBS, adjuvant and Sj29-2 immunized groups . (A) Worm burdens. (B) Liver egg burdens.

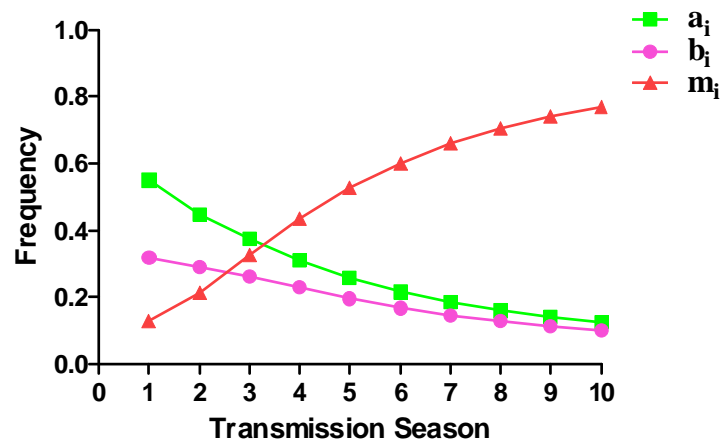

**Supplementary Figure 6.** Prediction of the change of the clades A, B and M frequencies ( $a_i$ ,  $b_i$  and  $m_i$ ) under immune pressure induced by multiple antigens S<sub>j29-2</sub> and S<sub>j29-4</sub>.



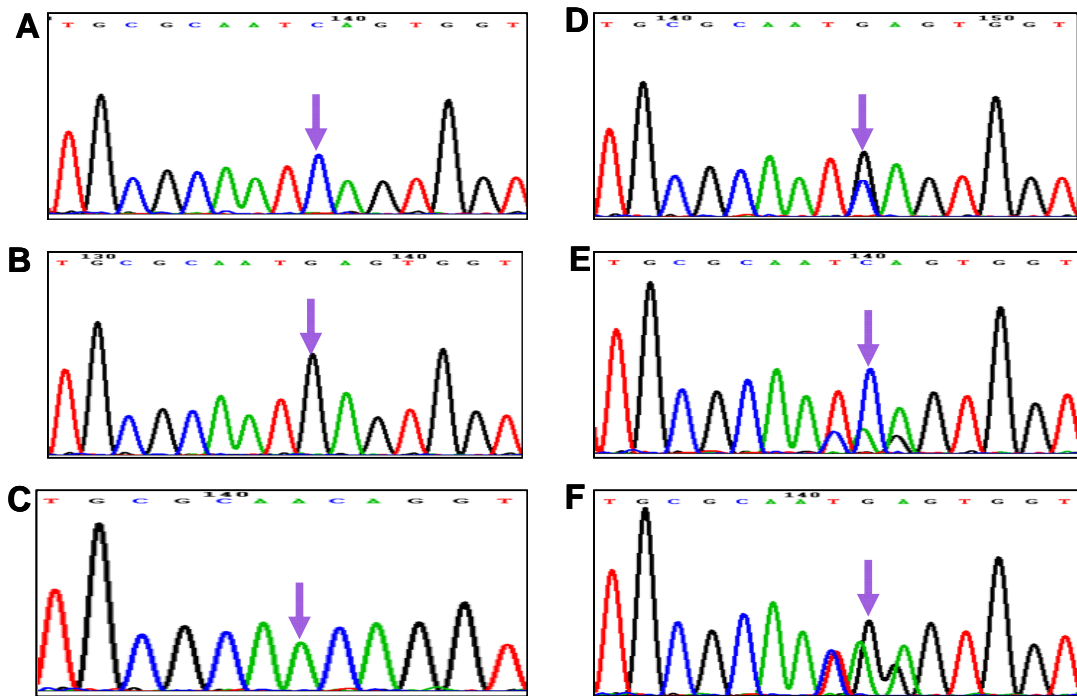

**Supplementary Figure 7.** Chromatogram traces around the nucleotide site 162 of different genotypes. The nucleotide site 162 was indicated by arrow. (A) AA genotype; (B) BB genotype; (C) MM genotype; (D) AB genotype; (E) AM genotype; (F) BM genotype.

**Supplementary Table 1.** Distribution of Sj29 alleles. Vertical numbers indicate the position of variable nucleotides within the sequence. Dots indicate the same nucleotides as is present in Sj29-1. No., number of alleles.

| No.     |     | Nucleotides position |            |              |             |            |             |            |             |             |   |
|---------|-----|----------------------|------------|--------------|-------------|------------|-------------|------------|-------------|-------------|---|
|         |     | 111111111            | 111111111  | 111111222    | 222222222   | 222222222  | 222223333   | 333334444  | 444444455   | 5           |   |
|         |     | 2246677789           | 9112233333 | 4444556666   | 7777789000  | 1111344455 | 5555677778  | 8888912355 | 7788912444  | 5556666902  | 2 |
|         |     | 3736901270           | 3182734789 | 0134031239   | 0238906278  | 1239645834 | 5678115782  | 4569770917 | 3404988589  | 0580145252  | 8 |
| Sj29-1  | 6   | CGTCAATTTC           | GGGTACCGAA | GCGTGTTTCCAG | TGAGACAATA  | AATGTAATAT | TGGCTGAGTC  | GGAGGCGCCT | CGCTCATGGC  | TGGGATATGA  | C |
| Sj29-2  | 49  | ..C.....             | .....      | .....        | .....       | .....      | .....C..... | .....      | .....T..... | .....A      | T |
| Sj29-3  | 2   | ..C.....             | .....      | .....        | .....       | .....      | .....C..... | .....      | .....T..... | .....       | T |
| Sj29-4  | 122 | .A.....              | .A...T...  | AT....G..    | ...CGA...G  | C.AAA...TC | .AA....C.   | ...AAAATG  | AATC.CAACA  | GTAC.ATCA.  | T |
| Sj29-5  | 2   | .A.....              | .A...T...  | AT....G..    | ...CGA...G  | C.AAA...TC | .AA....C.   | ...AAAATG  | AATC.CAACA  | GTAC.ATCA.  | . |
| Sj29-6  | 3   | .A.....              | .A...T...  | AT....G..    | ...CGA...G  | C.AAA...TC | .AA.....    | ...AAAATG  | AATC.CAACA  | GTAC.ATCA.  | T |
| Sj29-7  | 1   | .A.....              | .A...T...  | AT....G..    | ...CGA...G  | C.AAA...TC | .AA....C.   | ...AAAATG  | AATC.CAACA  | GTAC.AT.A   | T |
| Sj29-8  | 2   | .A.....              | .A.A.T...  | AT....G..    | ...CGA...G  | C.AAA...TC | .AA....C.   | ...AAAATG  | AATC.CAACA  | GTAC.ATCA.  | T |
| Sj29-9  | 1   | .A.....              | .A...T...  | AT....G..    | ...CGA...G  | C.AAA...C  | .AA....C.   | ...AAAATG  | AATC.CAACA  | GTAC.ATCA.  | T |
| Sj29-10 | 1   | .A.....              | .A...T...  | AT....G..    | ...CGA...G  | C.AAA...TA | .AA....C.   | ...AAAATG  | AATC.CAACA  | GTAC.ATCA.  | T |
| Sj29-11 | 2   | .A.....              | .A...T...  | AT....G..    | ...CGA...G  | CCAAA...TC | .AA....C.   | ...AAAATG  | AATC.CAACA  | GTAC.ATCA.  | T |
| Sj29-12 | 2   | .AC.....             | .A...T...  | AT....G..    | ...CGA...G  | C.AAA...TC | .AA....C.   | ...AAAATG  | AATC.CAACA  | GTAC.ATCA.  | T |
| Sj29-13 | 2   | TAC.....             | .A...T...  | AT....G..    | ...CGA...G  | C.AAA...TC | .AA....C.   | ...AAAATG  | AATC.CAACA  | GTAC.ATCA.  | T |
| Sj29-14 | 1   | .....                | .A...T...  | AT....G..    | ...CGA...G  | C.AAA...TC | .AA....C.   | ...AAAATG  | AATC.CAACA  | GTAC.ATCA.  | T |
| Sj29-15 | 1   | ..C.....             | .A...T...  | AT....G..    | ...CGA...G  | C.AAA...TC | .AA....C.   | ...AAAATG  | AATC.CAACA  | GTAC.ATCA.  | T |
| Sj29-16 | 3   | .A.....              | .A...T...  | AT....G..    | ...CGA...G  | C.AAA...TC | .AA....C.   | ...AAATG   | AATC..A.AA  | GTACG..CA.  | . |
| Sj29-17 | 1   | .A.....              | .A...T...  | AT....G..    | ...CGA...G  | C.AAA...TC | .AA....C.   | ...AAAATG  | AATC.CA.AA  | GTACG..CA.  | . |
| Sj29-18 | 2   | .A.....              | .A...T...  | AT....G..    | ...CGA...G  | C.AAA...TC | .AA...CACG  | TTG..AAATG | AATC..A.AA  | GTACG..CAG. | . |
| Sj29-19 | 2   | .A.....              | .A...T...  | AT.....      | .....A      | .....TA    | .AA....C.   | ...AAATG   | AATC.CAACA  | GTAC.ATCA.  | T |
| Sj29-20 | 32  | .A.TGTACCT           | .AAAG.GATG | A.TAACCAGA   | CAG.CAG...  | .A.AGTA.A  | AA.TA.CACG  | TTG..AAATG | AATC.CAACA  | GTAC.ATCA.  | T |
| Sj29-21 | 2   | .A.TGTACCT           | .AAAG.GATG | A.TAACCAGA   | CAG.CAG...  | .A.AGTA.A  | AA.TA.CACG  | TTG..AAATG | AATC.CAACA  | GTAC.ATCA.  | T |
| Sj29-22 | 2   | .A.TGTACCT           | .AAAG.GATG | A.TAACCAGA   | CAG.CAG...  | .A.AGTA.A  | AA.TA.CACG  | TTG..AAATG | AATC..A.AA  | GTACG..CA.  | . |
| Sj29-23 | 2   | ..CTGTACCT           | .AAAG.GATG | A.TAACCAGA   | CAG.CAG...  | .A.AGTA.A  | AA.TA.CACG  | TTG..AAATG | AATC..A.AA  | GTACG..CAG. | . |
| Sj29-24 | 1   | ...TGTACCT           | .AAAG.GATG | A.TAACCAGA   | CAG.GAG...  | .A.AGTA.A  | AA.TA.CACG  | TTG..AAATG | AATC..A.AA  | GTACG..CA.  | . |
| Sj29-25 | 2   | ...TGTACCT           | .AAAG.GATG | A.TAACCAGA   | CAG.GAG...  | .A.AGTA.A  | AA.TA.CACG  | TTG..AAATG | AATC..A.AA  | GTACG..CAG. | . |
| Sj29-26 | 2   | TACTGTACCT           | .AAAG.GATG | A.TAACCAGA   | CAG.CAG...  | .A.AGTA.A  | AA.TA.CACG  | TTG..AAATG | AATC..A.AA  | GTACG..CA.  | . |
| Sj29-27 | 2   | ...TGTACCT           | .AAAG.GATG | A.TAACCAGA   | CAG.GAGG... | ...AAG...A | AA.TACCAC   | TTGT.AAATG | AATC..A.AA  | GTACG..CA.  | . |
| Sj29-28 | 2   | TACT.TACCT           | CA...GAT   | A.ACACCAGA   | CAG.GAG...  | ...AAG...A | AA.TACCAC   | TTGT.AAATG | AATC..A.AA  | GTACG..CA.  | . |
| Sj29-29 | 1   | TACT.TACCT           | CA...GAT   | A.ACACCAGA   | CAG.GAGG... | ...AAG...A | AA.TACCAC   | TTGT.AAATG | AATC..A.AA  | GTACG..CA.  | . |
| Sj29-30 | 2   | TACT.TACCT           | CA...GAT   | A.ACACCAGA   | CAG.GAGG... | .C.AAG...A | AA.TACCAC   | TTGT.AAATG | AATC..A.AA  | GTACG..CA.  | . |
| Sj29-31 | 6   | TACT.TACCT           | CA...GAT   | A.ACACCAGA   | CAG.GAG...  | ...AAG...A | AA.TACCAC   | TTGT.AAATG | AATC.CAACA  | GTAC.ATCA.  | T |
| Sj29-32 | 1   | .ACT.TACCT           | CA...GAT   | A.ACACCAGA   | CAG.GAG...  | ...AAG...A | AA.TACCAC   | TTGT.AAATG | AATC.CAACA  | GTAC.ATCA.  | T |
| Sj29-33 | 1   | ..C.....             | .....      | .....CAGA    | CAG.GAG...  | ...AAG...A | AA.TACCAC   | TTGT.AAATG | AATC..A.AA  | GTACG..CA.  | . |
| Sj29-34 | 1   | ..C.....             | .....      | .....        | .....       | .....      | .....C..... | ...AAAATG  | AATC.CAACA  | GTAC.ATCA.  | T |
| Sj29-35 | 1   | ..C.....             | .....      | .....        | .....       | .....TC    | .AA....C.   | ...AAAATG  | AATC.CAACA  | GTAC.ATCA.  | T |
| Sj29-36 | 2   | .A.....              | .A...T...  | AT.....      | .....A      | .....TA    | .AA....C.   | ...AAATG   | AATC.....   | .....A.     | . |
| Sj29-37 | 1   | .A.....              | .A...T...  | AT.....      | .....A      | .....TA    | .AA....C.   | ...AAATG   | AATC.....   | .....       | . |

**Supplementary Table 2.** Comparison of Sj29 genotype distribution in protein immunized groups, adjuvant immunized control group and PBS control group.

|               | <b>Groups</b> | <b>Survived Worms</b> | <b>Genotypes</b> |           |           |           |           |           |
|---------------|---------------|-----------------------|------------------|-----------|-----------|-----------|-----------|-----------|
|               |               |                       | <b>AA</b>        | <b>BB</b> | <b>MM</b> | <b>AB</b> | <b>AM</b> | <b>BM</b> |
| <b>EXP. 1</b> | PBS           | 238                   | 25               | 53        | 22        | 72        | 30        | 36        |
|               | Adjuvant      | 247                   | 34               | 61        | 27        | 61        | 44        | 20        |
|               | Sj29-2        | 174                   | 4                | 54        | 22        | 49        | 16        | 29        |
| <b>EXP. 2</b> | PBS           | 252                   | 104              | 37        | 5         | 49        | 39        | 18        |
|               | Adjuvant      | 237                   | 95               | 43        | 5         | 41        | 29        | 24        |
|               | Sj29-2        | 175                   | 32               | 22        | 5         | 54        | 35        | 27        |
|               | Sj29-4        | 181                   | 57               | 13        | 5         | 58        | 25        | 23        |
|               | Sj29-20       | 202                   | 68               | 35        | 0         | 47        | 40        | 12        |
|               | Mix           | 139                   | 49               | 28        | 2         | 15        | 28        | 17        |

**Supplementary Table 3.** Nucleotide diversity at different region of the Sj29 gene

| Region               | Residues | $\pi$ (S.D) <sup>a</sup> | S <sup>b</sup> | A <sup>c</sup> | $dN$ (s.e) <sup>d</sup> | $dS$ (s.e) <sup>e</sup> | $dN/dS$ |
|----------------------|----------|--------------------------|----------------|----------------|-------------------------|-------------------------|---------|
| Entire gene          | 1-192    | 0.060(0.040)             | 91             | 37             | 0.059(0.009)            | 0.082(0.015)            | 0.72    |
| Signal peptides      | 1- 26    | 0.044(0.025)             | 8              | 11             | 0.020(0.017)            | 0.155(0.082)            | 0.13    |
| Extracellular domain | 27-170   | 0.071(0.048)             | 81             | 28             | 0.076(0.012)            | 0.078(0.018)            | 0.97    |
| Transmembrane domain | 171-192  | 0.010(0.007)             | 2              | 2              | 0.000(0.000)            | 0.040(0.038)            | 0.00    |

a. Nucleotide diversity (all sites-synonymous and nonsynonymous mutations- are considered in the calculation) and its standard deviation in parentheses.

b. Number of polymorphism sites.

c. Number of alleles.

d. Number of nonsynonymous mutations sites per nonsynonymous site using the Nei-Gojobori method with the jukes-cantor correction and standard error in parentheses.

e. Number of synonymous mutations sites per synonymous site using the Nei-Gojobori method with the jukes-cantor correction and standard error in parentheses.
